*Evolution of cold response in Pooideae*

1 **Comparative transcriptomics reveals lineage specific evolution of**  
2 **cold response in Pooideae**

3 Lars Grønvold<sup>1\*</sup>, Marian Schubert<sup>2\*</sup>, Simen R. Sandve<sup>3</sup>, Siri Fjellheim<sup>2</sup> and Torgeir R.  
4 Hvidsten<sup>1,4</sup>

5 \*Contributed equally

6 <sup>1</sup>Department of Chemistry, Biotechnology and Food Science, Norwegian University of Life  
7 Sciences, NO-1432, Ås, Norway.

8 <sup>2</sup>Department of Plant Sciences, Norwegian University of Life Sciences, Ås NO-1432, Norway.

9 <sup>3</sup>Centre for Integrative Genetics (CIGENE), Department of Animal and Aquacultural Sciences,  
10 Norwegian University of Life Sciences, NO-1432, Ås, Norway.

11 <sup>4</sup>Umeå Plant Science Centre, Department of Plant Physiology, Umeå University, SE-90187,  
12 Umeå, Sweden.

13 Author for correspondence:

14 Torgeir R. Hvidsten

15 Tel: +4767232491

16 Email: [torgeir.r.hvidsten@nmbu.no](mailto:torgeir.r.hvidsten@nmbu.no)

## *Evolution of cold response in Pooideae*

### 17 **Abstract**

18 **Background:** Understanding how complex traits evolve through adaptive changes in gene  
19 regulation remains a major challenge in evolutionary biology. Over the last ~50 million years,  
20 Earth has experienced climate cooling and ancestrally tropical plants have adapted to expanding  
21 temperate environments. The grass subfamily Pooideae dominates the grass flora of the  
22 temperate regions, but the role of cold-response gene regulation in the transitioning from tropical  
23 to temperate climate remains unexplored.

24 **Results:** To establish if molecular responses to cold are conserved throughout the phylogeny, we  
25 assembled the transcriptomes of five Pooideae species spanning early to later diverging lineages,  
26 and compared short- and long-term cold responsive genes using 8633 high confidence ortholog  
27 groups with resolved gene tree topologies. We found that a majority of cold responsive genes  
28 were specific to one or two lineages, an observation that we deem incompatible with a cold  
29 adapted Pooideae ancestor. However, all five species shared short-term cold response in a small  
30 set of general stress genes as well as the ability to down-regulate the photosynthetic machinery  
31 during cold temperatures.

32 **Conclusions:** Our observations indicate that the different Pooideae lineages have assembled cold  
33 response programs in parallel by taking advantage of a common potential for cold adaptation.

34

35 **Key words:** regulatory evolution, cold response, comparative transcriptomics, Pooideae,  
36 adaptation

## *Evolution of cold response in Pooideae*

### 37 **Background**

38 Adaptation to a changing climate is essential for long term evolutionary success of plant  
39 lineages. During the last ~50 million years of climate cooling (Fig. 1c), several plant species  
40 adapted to temperate regions. A key step in this transitioning was the integration of novel  
41 temperate climate cues, such as seasonal fluctuations in temperature, in the regulatory network  
42 controlling cold stress responses. Here we used the temperate grass subfamily Pooideae as a  
43 model system for studying gene regulatory evolution of cold stress.

44 The temperate grass flora is dominated by members of the subfamily Pooideae [1], and the most  
45 extreme cold environments are inhabited by Pooideae species. The ancestors of this group were,  
46 however, most likely adapted to tropical or subtropical climates [2, 3]. Many Pooideae species  
47 experience cold winters (Fig. 1b) and although a recent study inferred adaptation to cooler  
48 environments at the base of the Pooideae phylogeny [4], it is still not known whether the  
49 Pooideae's most recent common ancestor (MRCA) already was adapted to cold stress, or if  
50 adaptation to cold evolved independently in the Pooideae lineages.

51 Pooideae is a large subfamily comprising 4200 species [5], amongst them economically  
52 important species such as wheat and barley. Given the commercial importance of this group,  
53 various aspects of adaptation to temperate climate such as flowering time, cold acclimation, and  
54 frost and chilling tolerance have been studied (reviewed by [6–13]). These studies are, however,  
55 confined to a handful of species in the species rich, monophyletic clade “core Pooideae” [14] and  
56 recently also to its sister clade, containing the model grass *Brachypodium distachyon* [15–17]. It  
57 is thus unknown how adaptation to temperate climate evolved in earlier diverging Pooideae  
58 lineages to promote the success of this subfamily in temperate regions.

59 Environmental stress is assumed to be a strong evolutionary force, and the colonization of  
60 temperate biomes by Pooideae was likely accompanied by adaptation to cold conditions. A  
61 MRCA already adapted to cold (the ancestral hypothesis) offers a plausible basis for the  
62 ecological success of the Pooideae subfamily in the northern temperate regions [1]. However,  
63 paleoclimatic reconstructions infer a generally warm climate, and a very limited abundance of  
64 temperate environments, during the time of Pooideae emergence, around 50 million years ago  
65 (Mya) [18–22]. Indeed, it was not before ca. 33.5 Mya, during the Eocene-Oligocene (E-O)

## *Evolution of cold response in Pooideae*

66 transition, that the global climates suddenly began to cool [23, 24] (Fig. 1c). Climate cooling at  
67 the E-O transition coincided with the emergence of many temperate plant lineages [25] and may  
68 have been an important selection pressure for improved cold tolerance in Pooideae [26, 27]. If  
69 the E-O cooling event has been the major evolutionary driving force for cold adaptation in  
70 Pooideae grasses, those findings lend support for lineage specific evolution of cold adaptation  
71 (the lineage specific hypothesis), as all major Pooideae lineages had already emerged by the time  
72 of the E-O transition [2, 28] (Fig. 1a).

73 A restricted number of plant lineages successfully transitioned into the temperate region,  
74 emphasizing the difficulties in evolving the coordinated set of physiological changes needed to  
75 withstand low temperatures [29]. During prolonged freezing, plants need to maintain the  
76 integrity of cell membranes to avoid osmotic stress [30]. Cold and freezing tolerance is  
77 associated with the ability to cold acclimate, which is achieved through a period of extended,  
78 non-freezing cold triggered by the gradually lower temperature and day-length in the autumn.  
79 During cold acclimation, a suite of physiological changes governed by diverse molecular  
80 pathways results in an increase in the sugar content of cells, change in lipid composition of  
81 membranes and synthesis of anti-freeze proteins [13, 31]. Also, low non-freezing temperatures  
82 may affect plant cells by decreasing metabolic turnover rates, inhibiting the photosynthetic  
83 machinery and decreasing stability of biomolecules (e.g. lipid membranes) [10, 12]. Several  
84 studies have used transcriptomics to compare cold stress response, however, they focused on  
85 closely related taxa or varieties within model species [17, 32–36]. As such, these studies were  
86 not able to investigate evolutionary mechanisms underlying adaptation to cold climates of entire  
87 clades.

88 Here, we used *de novo* comparative transcriptomics across the Pooideae phylogeny to study the  
89 evolution of cold adaptation in Pooideae. Specifically, we aim to establish if molecular responses  
90 to cold are conserved in the Pooideae subfamily or if they are the result of lineage specific  
91 evolution. The transcriptomes of three non-model species (*Nardus stricta*, *Stipa lagascae* and  
92 *Melica nutans*), which belong to early diverging lineages, were compared to the transcriptomes  
93 of the model grass *Brachypodium distachyon* and the core Pooideae species *Hordeum vulgare*  
94 (barley). 8633 high confidence ortholog groups with resolved gene tree topologies were used to  
95 identify cold-response genes. We found that only a small number of genes were cold responsive

## Evolution of cold response in Pooideae

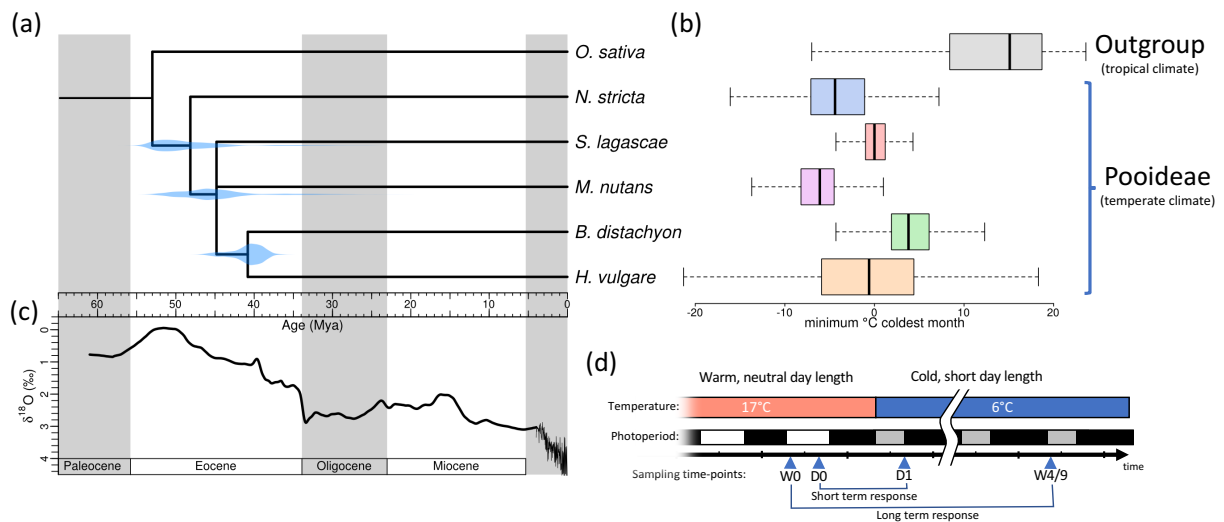

**Figure 1. The Pooideae phylogeny, present and historic temperature data and the experimental design of this study.** (a) Dated phylogenetic tree of the five Pooideae investigated in this study with *O. sativa* as an out-species. The species phylogeny was inferred from gene trees, with the distribution of mean gene-tree node ages shown in blue. (b) The range of the minimum temperature of the coldest month (WorldClim v1.4 dataset, Bioclim variable 6, 2.5 km<sup>2</sup> resolution [95]) at the species geographical distribution (source: [www.gbif.org](http://www.gbif.org)). (c) Oxygen isotope ratios as a proxy for historic global temperature [18, 22] (d) Experimental design. Plants from five species of Pooideae were subjected to a drop in temperature and shorter days to induce cold response. Leaf material was sampled on the day before the onset of cold (W0 and D0), once 8 hours after cold (D1) and two times after 4 and 9 weeks (W4/W9). Short-term response was identified by contrasting gene expression in time points D0 and D1, while long-term response was identified contrasting W0 and W4/W9.

96 in all the investigated Pooideae species, which suggested that their common ancestor only  
 97 possessed few and possibly key, preliminary cold response mechanisms, and that evolution of  
 98 cold responses evolved primarily independently in different Pooideae lineages.

## Evolution of cold response in Pooideae

### 99 **Results**

100 To investigate the evolution of cold response in Pooideae, we sampled leaf material in five  
101 species before and after subjecting them to a drop in temperature and shorter days (Fig. 1d).  
102 RNA-sequencing (RNA-Seq) was used to reveal the short and long term cold response of  
103 transcripts, and the conservation of these responses was analyzed in the context of ortholog  
104 groups.

#### 105 *De novo transcriptome assembly identified 8633 high confidence ortholog groups*

106 The transcriptome of each species was assembled *de novo* resulting in 146k-282k contigs, of  
107 which 68k-118k were identified as containing coding sequences (CDS, Table S1). Ortholog  
108 groups (OGs) were inferred by using the protein sequences from the five *de novo* assemblies, as  
109 well as the reference genomes of *L. perenne*, *H. vulgare*, *B. distachyon*, *Oryza sativa*, *Sorghum*  
110 *bicolor* and *Zea mays*. The five assembled Pooideae species were represented with at least one  
111 transcript in 24k-33k OGs (Table S1).

112 Gene trees were generated for each OG and a set of high confidence OGs (HCOGs) was  
113 identified by filtering based on the topology of the gene trees (see Methods). This resulted in  
114 8633 high confidence ortholog groups (HCOGs) containing transcripts from at least three of the  
115 five studied species (Table S1, Table S2).

116 *De novo* assembly followed by ortholog detection resulted in higher numbers of monophyletic  
117 species-specific paralogs than the number of paralogs in the reference genomes of *H. vulgare*  
118 and *B. distachyon*. This apparent overestimation of paralogs was almost certainly the result of the  
119 *de novo* procedure assembling alleles or alternative transcript isoforms into separate contigs. We  
120 also observed some cases where the number of paralogs were under-estimated compared to the  
121 references, which may be due to low expression of these paralogs or the assembler collapsing  
122 paralogs into single contigs. Since the *de novo* assembly procedure did not reliably assemble  
123 paralogs, we chose to represent each species in each HCOG by a single read-count value equal to  
124 the sum of the expression of all assembled paralogs. By additionally setting counts for missing  
125 orthologs to zero, we created a single cross species expression matrix with HCOGs as rows and  
126 samples as columns (Table S3).

## *Evolution of cold response in Pooideae*

### 127 *A dated species tree of the Pooideae*

128 Dated gene trees were generated using prior knowledge about the divergence times of *Oryza*-  
129 Pooideae [37] and *Brachypodium-Hordeum* [28]. Based on 3914 gene trees with exactly one  
130 sequence from each of the five Pooideae and rice (see Methods), a dated species tree was  
131 estimated using the mean divergence times of the gene trees (Fig. 1a). In the most common gene  
132 tree topology, *S. lagascae* or *M. nutans* formed a monophyletic clade, but topologies where  
133 either *S. lagascae* or *M. nutans* diverged first were also common (Fig. S1). Due to this  
134 uncertainty regarding the topology, *S. lagascae* and *M. nutans* branches were collapsed to a  
135 polytomy in the consensus species tree.

### 136 *Expression clustering indicated a common global response to cold*

137 To investigate broad scale expression patterns in cold response, we clustered all samples  
138 (including replicates) after scaling the expression values of each gene to remove differences in  
139 absolute expression between species (see Methods, Fig. 2a). This clustering revealed the  
140 differential effects of the treatments and resulted in a tree with replicates, and then time points,  
141 clustering together. An exception was time points W4 and W9, which tended to cluster together  
142 and by species, indicating that responses after 4 and 9 weeks were very similar. The fact that  
143 time points mostly clustered together before species indicated a common response to cold across  
144 species. We also observed a clear effect of the diurnal rhythm, with time points sampled in the  
145 morning (W0, W4 and W9) forming one cluster and time points sampled in the afternoon (D0  
146 and D1) forming another.

### 147 *Cold responsive genes were primarily species specific*

148 We next examined similarities in short and long term cold response between species by  
149 analysing changes in gene expression from before cold treatment to eight hours and 4-9 weeks  
150 after cold treatment (Fig. 1d). For all species pairs, there was a low, but statistically significant,  
151 correlation between the expression fold changes of orthologs in HCOGs (Fig. 2b). A similar  
152 pattern was observed when investigating the number of orthologs classified as differentially  
153 expressed in pairs of species (FDR adjusted p-value < 0.05 and fold change > 2, Table S4, see  
154 Methods): these numbers were low compared to the number of differentially expressed genes  
155 (DEGs) in individual species, but higher than expected by chance (Fisher's exact test p < 0.05,

## Evolution of cold response in Pooideae

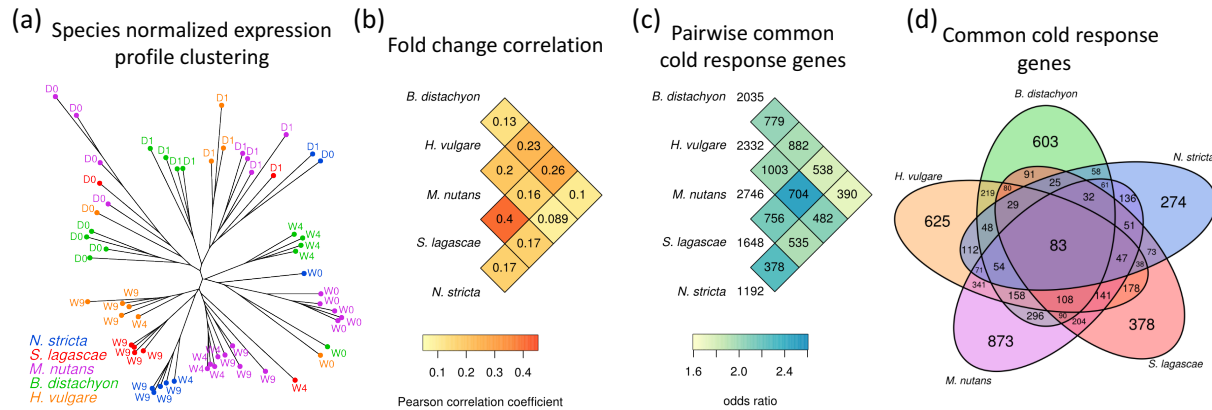

**Figure 2. Comparison of cold response across the Pooideae.** (a) Expression clustering of the samples. The tree was generated by neighbor-joining of Manhattan distances given as the sum of log fold changes between all highly expressed genes after subtracting the mean expression per species. Each tip corresponded to one sample. (b) The Pearson correlations of log fold expression changes (only short-term cold response is shown) between pairs of species. The correlations were computed based on the high confidence ortholog groups (HCOG). (c) The number of differentially expressed genes per species and shared between pairs of species. The statistical significance of the overlaps between pairs of species were indicated with odds ratios. (d) The number of differentially expressed genes in each species (FDR adjusted  $p$ -value  $< 0.05$  and absolute fold change  $> 2$  in either short- or long-term cold response) and overlap between species.

156 Fig. 2c). Finally, the number of orthologs with differential expression in more than two species  
 157 were very low (Fig. 2d), with only 83 DEGs common to all five species. Taken together, these  
 158 observations suggest that cold response in Pooideae is primarily lineage specific, with low but  
 159 significant similarities between pairs of species both with respect to fold change and differential  
 160 expression. Noticeably, neither the similarities in differential expression nor the fold change  
 161 correlations reflected the phylogenetic relationship between the species, that is, the cold  
 162 responses of related species were not more similar than that of distantly related species.

### 163 Shared cold response genes included known abiotic stress genes

164 Sixteen genes shared the same cold response (short- or long-term) in the same direction (up or  
 165 down) in all five Pooideae species, thus representing a response to cold that might have been



## Evolution of cold response in Pooideae

**Table 1. High confidence ortholog groups with conserved cold response in all five Pooideae.**

*S* = short-term response, *L* = long-term response.  $\nearrow$  = up regulated,  $\searrow$  = down regulated. Annotations were inferred from literature using orthologs. These 16 genes were the subset of the 83 genes in Fig. 2d with the same type of cold response (short- or long-term) in the same direction (up- or down-regulation) in all five species.

| Bd ortholog  | Description and relation to stress response                                                                                                                                                                                                                                                                                                                       | Response       |
|--------------|-------------------------------------------------------------------------------------------------------------------------------------------------------------------------------------------------------------------------------------------------------------------------------------------------------------------------------------------------------------------|----------------|
| Bradi2g39230 | <b>HyperOSmolality-gated CA2+ permeable channel (OSCA)</b> - Stress-activated calcium channels [65] that are highly conserved in eukaryotes [66]. In <i>Oryza sativa</i> , OSCA genes are differentially expressed in response to osmotic stress [67].                                                                                                            | S $\nearrow$   |
| Bradi2g06830 | <b>Calcium-binding EF-hand containing calcium exchange channel (EF-CAX)</b> - Calcium ions are important mediators of abiotic stress in plants [68, 69]. Expression of calcium binding proteins correlates with exposure to cold stress in several plants, e.g. <i>Arabidopsis thaliana</i> [30], <i>Musa × paradisiaca</i> [70] and <i>Hordeum vulgare</i> [38]. | S $\nearrow$   |
| Bradi2g05226 | <b>GIGANTEA</b> - Promotes flower development in plants [71]. In <i>Arabidopsis thaliana</i> , this gene is involved in CBF-independent freezing tolerance [72, 73], and is responsive to cold in <i>Zea mays</i> [74]. Also part of the circadian clock.                                                                                                         | S $\nearrow$   |
| Bradi4g24967 | <b>Arabidopsis Pseudo-Response Regulator 3-like (AtPRR3-like)</b> - AtPRR3 is a member of the circadian clock quintet AtPRR1/TOC1 [75, 76]. No association to stress response found in literature. However, AtPRR3-like might be closer related to AtPRR5/9 than to AtPRR3 (See Bradi4g36077, PRR95).                                                             | S $\nearrow$   |
| Bradi2g09060 | <b>Triacylglycerol lipase, alpha/beta-Hydrolase superfamily</b> - Studies in <i>Arabidopsis thaliana</i> [77] and <i>Ipomoea batatas</i> [78] suggest that genes with alpha/beta-Hydrolase domains respond to osmotic stress. In <i>Triticum monococcum</i> , triacylglycerol lipase was induced by pathogen stress [79].                                         | S $\nearrow$   |
| Bradi2g07480 | <b>Late-Embryogenesis-Abundant protein 14 (LEA-14)</b> - Responsive to drought, salt and cold stress in <i>Arabidopsis thaliana</i> [80, 81], <i>Betula pubescens</i> [82] and <i>Brachypodium distachyon</i> [83].                                                                                                                                               | S $\nearrow$   |
| Bradi1g04150 | <b>SNAC1-like / NAC transcription factor 67</b> - NAC transcription factors mediate abiotic stress responses. Osmotic stress increases the expression of SNAC1 in <i>Oryza sativa</i> [84], NAC68 in <i>Musa × paradisiaca</i> [70, 85] and NAC67 <i>Triticum aestivum</i> [86].                                                                                  | S $\nearrow$   |
| Bradi4g36077 | <b>Pseudo-Response Regulator 95 (PRR95)</b> - Homologous to conserved circadian clock gene AtPRR5/9 [87, 88]. AtPRR5 gene is cold regulated in <i>Arabidopsis thaliana</i> [89] and PRR95 is cold responsive in <i>Zea mays</i> [74].                                                                                                                             | S $\nearrow$   |
| Bradi2g43040 | <b>DnaJ chaperon protein</b> - DnaJ co-chaperons are vital in stress response and has been found to be involved in maintenance of photosystem II under chilling stress and enhances drought tolerance in tomato [90, 91].                                                                                                                                         | S+L $\nearrow$ |
| Bradi3g33080 | <b>Glycogenin GlucuronosylTransferase (GGT)</b> - GGT belongs to the GT8 protein family [92]. In <i>Oryza sativa</i> , OsGGT transcripts are induced in submerged plants and respond to various abiotic stresses except cold [93, 94].                                                                                                                            | L $\nearrow$   |
| Bradi1g04500 | <b>Major facilitator superfamily transporter</b> - Association to stress response unknown.                                                                                                                                                                                                                                                                        | L $\nearrow$   |
| Bradi3g14080 | <b>Glycosyl transferase</b> - Association to stress response unknown.                                                                                                                                                                                                                                                                                             | L $\nearrow$   |
| Bradi1g35357 | <b>Uncharacterized membrane protein</b> - Association to stress response unknown.                                                                                                                                                                                                                                                                                 | S $\nearrow$   |
| Bradi2g48850 | <b>Uncharacterized protein</b> - Association to stress response unknown.                                                                                                                                                                                                                                                                                          | S $\nearrow$   |
| Bradi1g33690 | <b>Uncharacterized protein</b> - Association to stress response unknown.                                                                                                                                                                                                                                                                                          | S $\nearrow$   |
| Bradi1g07120 | <b>Putative S-adenosyl-L-methionine-dependent methyltransferase</b> - Association to stress response unknown.                                                                                                                                                                                                                                                     | L $\searrow$   |

166 conserved throughout the evolution of Pooideae (Table 1). Several of these shared cold  
 167 responsive genes belonged to families known to be involved in cold stress or other abiotic stress  
 168 responses in other plant species. The most common type of response was short-term up

## Evolution of cold response in Pooideae

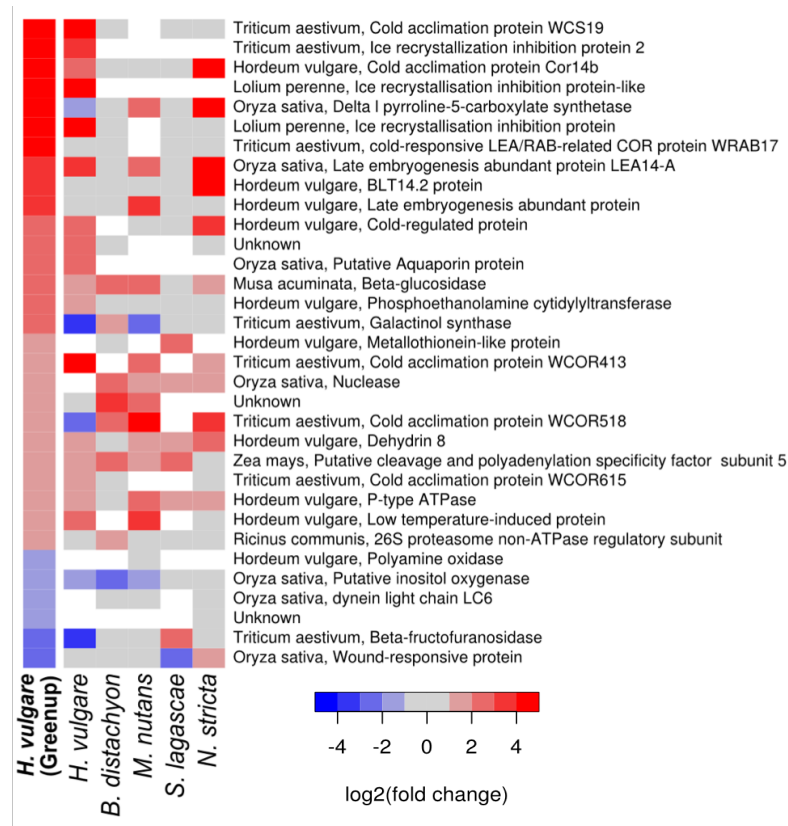

**Figure 3. Comparison of cold response to previous studies.** A reference set of *H. vulgare* genes independently shown to respond to cold in several studies [38] is compared to our data using short-term log fold change values. White cells represent missing orthologs. Grey cells represent orthologs that were not differentially expressed (not DEGs).

169 regulation, indicating that stress response, as opposed to long-term acclimation response, is  
 170 potentially more conserved.

### 171 Identified cold response genes confirmed previous findings

172 We compared the cold response genes from our data to a compilation of *H. vulgare* genes shown  
 173 to be responsive to low temperature in several previous microarray studies, subsequently referred  
 174 to as the Greenup genes (table S10 in [38]). We could map 33 of these 55 genes to unique OGs,  
 175 of which 11 were HCOGs. We observed significant similarity in cold response between the 33  
 176 Greenup genes and the short-term cold response observed in our data (Fig. 3); for all five species  
 177 ( $p < 0.05$ , see Methods). However, this similarity was noticeably larger in *H. vulgare* than in the  
 178 other four species. This comparison showed that our transcriptome data was consistent with

## Evolution of cold response in Pooideae

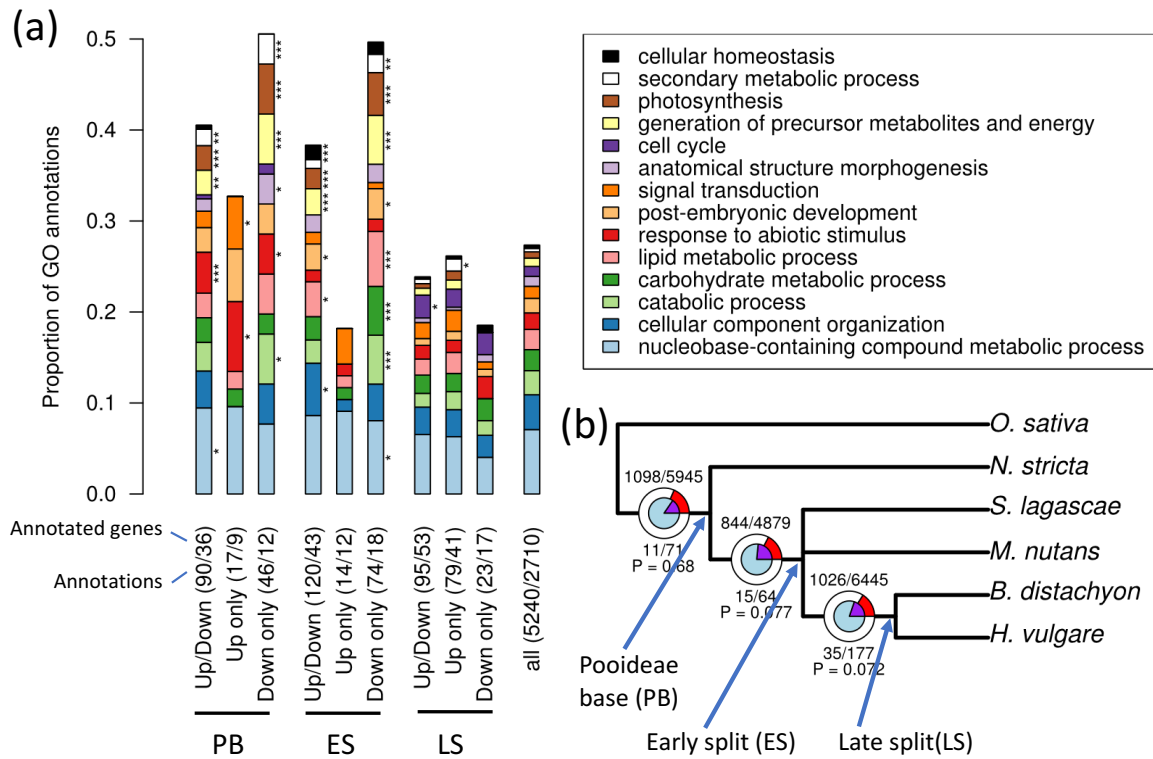

**Figure 4. Gene Ontology enrichment and positive selection in branch specific cold responsive genes.** (a) Gene ontology enrichment analysis of high confidence ortholog groups (HCOG) that were differentially expressed (DEGs) in all species (PB), only in species after *N. stricta* split off (ES) or only in *B. distachyon* and *H. vulgare* (LS) (\*  $P < 0.05$ , \*\*  $P < 0.01$ , \*\*\*  $P < 0.005$ , Fisher's exact test). Both the number of annotated genes and the number of annotations were indicated for each set of branch specific DEGs. (b) Positive selection at different stages in Pooideae evolution. The circles represent the high confidence ortholog groups that were tested for positive selection at each split (see Methods for the criteria). The inner blue circle represented HCOGs with branch specific differential expression (i.e. with genes that were cold responsive exclusively in the species under the respective branch) while the outer circle represented all other HCOGs. The purple and red pie-slices represented the proportions of HCOGs with positive selection ( $P < 0.05$ ). The P-value indicated the overrepresentation of positive selection among the branch specific DEGs (Hypergeometric test).

### *Evolution of cold response in Pooideae*

179 previous findings in *H. vulgare*, and that cold response genes identified in *H. vulgare* exhibits  
180 some cold response in other Pooideae.

#### 181 *Photosynthesis was down-regulated under cold stress*

182 To identify biological processes that evolved regulation during different stages of Pooideae  
183 evolution, we targeted gene sets that were exclusively differentially expressed in all species  
184 within a clade in the phylogenetic tree (i.e. branch specific DEGs), and tested these for enrichment  
185 of Gene Ontology (GO) biological process annotations (Fig. 4a). For the genes that were  
186 differentially expressed in all our species (Pooideae base [PB] in Fig 4b), we found enrichments  
187 for annotations related to response to abiotic stimulus, photosynthesis and metabolism. Dividing  
188 the branch specific DEGs into up- or down-regulated genes revealed up-regulation of signal  
189 transduction (two pseudo response regulators and diacylglycerol kinase 2 (DGK2)) and abiotic  
190 stimulus (Gigantea, LEA-14, DnaJ and DGK2), and down-regulation of photosynthesis and  
191 metabolism. For the genes that were exclusively differentially expressed in all species except *N.*  
192 *stricta* (early split [ES] in Fig. 4b), down-regulated genes were again enriched for GO  
193 annotations related to metabolism and photosynthesis.

#### 194 *Cold response genes were associated with positive selection on amino acid content*

195 For each HCOG, we tested for positive selection in coding sequences at each of the internal  
196 branches of the species tree. The tests were only performed on the branches where the gene tree  
197 topology was compatible with the species tree topology (see Methods). 16-18% of the HCOGs  
198 showed significant signs of positive selection ( $P < 0.05$ ) depending on the branch (Fig. 4b). Next,  
199 we tested for overrepresentation of positive selection among the branch specific DEGs. There  
200 was a tendency that gain of cold response was associated with positive selection at the early split  
201 (ES) and late split (LS) branches ( $P = 0.077$  and  $P = 0.072$ , respectively) (Fig. 4b).

## *Evolution of cold response in Pooideae*

### 202 **Discussion**

203 The ecological success of the Pooideae subfamily in the northern temperate regions must have  
204 critically relied on adaptation to colder temperatures. However, it is unclear how this adaptation  
205 evolved within Pooideae. To test whether molecular responses to cold are conserved in the  
206 Pooideae subfamily, we applied RNA-seq to identify short- and long-term cold responsive genes  
207 in five Pooideae species ranging from early diverging lineages to core Pooideae species. Since  
208 three of the species lacked reference genomes, we employed a *de novo* assembly pipeline to  
209 reconstruct the transcriptomes and showed that this pipeline could recover a set of *H. vulgare*  
210 genes previously identified as cold responsive (Fig. 3). In order to compare the five  
211 transcriptomes, we compiled a set of 8633 high confidence ortholog groups with resolved gene  
212 tree topologies. Gene expression clustering based on these ortholog groups arranged samples  
213 according to replicates, then time points and finally species, indicating that cold response was the  
214 primary signal in the data and confirming the soundness of the approach (Fig. 2a).

#### 215 *Lineage specific adaptations to cold climates*

216 A substantial portion of the individual Pooideae transcriptomes responded to cold (1000-3000  
217 genes), however, only a small number of genes responded to cold in all the investigated species  
218 (83 genes, Fig. 2d). Even fewer genes responded similarly to cold in all species (e.g. short-term  
219 up-regulation, 16 genes, Table 1) and these shared cold response genes primarily included  
220 general abiotic stress genes clearly not representative of all the different molecular pathways  
221 constituting a fully operational cold response program. We also observed low correlations in  
222 expression fold changes between species, a result that was independent of our ability to correctly  
223 classify genes as differentially expressed. All these results were based on high confidence  
224 ortholog groups that excluded complex families with duplication events shared by two or more  
225 species. Since many of the previously described *H. vulgare* cold responsive genes belonged to  
226 such complex families, we could have underestimated the number of shared cold responsive  
227 genes. However, we specifically investigated the regulation of these previously described genes  
228 using all ortholog groups, and again found that few genes displayed shared cold response across  
229 all species (Fig. 3), thus confirming our conclusion that cold response in Pooideae is largely  
230 species specific. Taken together, our findings indicated that the most recent common ancestor of  
231 the Pooideae possessed no, or only a limited, response to cold, and, consequently, that our data

### *Evolution of cold response in Pooideae*

232 appears more consistent with the lineage specific hypothesis of Pooideae cold adaptation than the  
233 ancestral hypothesis.

234 The drastic cold stress during the E-O transition was likely an important cause for the evolution  
235 of cold adaptation in Pooideae. Previous studies have shown that many temperate plant lineages  
236 emerged during the E-O transition [25] and that the expansion of well-known cold responsive  
237 gene families in Pooideae coincided with this transition [15, 26]. From the dated phylogeny (Fig.  
238 1a) as well as from earlier studies of the Pooideae phylogeny [2, 28], it was clear that all major  
239 Pooideae lineages, including the core Pooideae, had emerged by the late Eocene. Hence, the five  
240 lineages studied here experienced the E-O transition as individual lineages (Fig. 1c).  
241 Furthermore, we found that closely related species did not share a higher fraction of cold  
242 responsive genes than more distantly related species (no phylogenetic pattern, Fig. 2b-d). The  
243 observation that the five Pooideae lineages emerged during a relatively warm period before the  
244 E-O transition, and the finding that these species harbored high numbers of species specific cold  
245 responsive genes with no phylogenetic pattern, together suggested that most of the cold response  
246 in Pooideae lineages evolved in parallel during the last 40 M years. During this period,  
247 temperatures were constantly decreasing and dramatic cooling events took place, such as the E-O  
248 transition and the current Quaternary Ice Age.

249 Our results suggested that the Pooideae lineages evolved cold response in parallel using, to a  
250 large degree, unrelated genes. This implies that different genes can be co-opted into the  
251 functional cold response of the Pooideae. It is worth noticing, however, that although we  
252 observed many species specific cold response genes, all species pairs displayed a statistically  
253 significant correlation in cold response across all HCOGs (Fig. 2b) and a statistically  
254 significantly overlap in cold responsive genes (Fig. 2c). This may reflect that some genes code  
255 for proteins with biochemical functions more suited to be recruited for cold response than others  
256 [39, 40], and that different species thus have ended up co-opting orthologous genes into their  
257 cold response program more often than expected by chance.

### *An adaptive potential in the Pooideae ancestor*

259 Multiple independent origins of cold adaptation raise the question whether connecting traits  
260 exists in the evolutionary history of the Pooideae that can explain why the Pooideae lineages  
261 were able to shift to the temperate biome. The transcripts that were cold responsive across all

### *Evolution of cold response in Pooideae*

262 five species (Table 1) represented genes that might have gained cold responsiveness in the  
263 Pooideae most recent common ancestor and contributed to increase the potential of Pooideae  
264 lineages to adapt to a cold temperate climate. Several of these conserved genes were known to be  
265 involved in abiotic stresses in other plants such as drought or other osmotic stress, which share  
266 some physiological effects experienced during freezing. Co-option of such genes into a cold-  
267 responsive pathway might have been the key to acquire cold tolerance. In fact, other studies have  
268 implied that drought tolerance might have facilitated the shift to temperate biome [26, 41, 42].  
269 Interestingly, most of the conserved genes were short-term cold responsive (Table 1) and this  
270 observation strengthened the hypothesis that existing stress genes might have been the first to be  
271 co-opted into the cold response program. Also, three of the conserved cold responsive genes  
272 (GIGANTEA, PRR95 and AtPRR3-like) were associated with the circadian clock that is known  
273 to be affected by cold [43–45]. This might suggest that clock genes have had an important  
274 function in the Pooideae cold adaptation, for example by acting as a signal for initiating the cold  
275 defense. More generally, transcripts involved in photosynthesis and response to abiotic stimuli  
276 were significantly enriched among the genes with cold response in all species (Fig. 4a). An  
277 expanded stress responsiveness towards cold stress and the ability to down-regulate the  
278 photosynthetic machinery during cold temperatures to prevent photoinhibition might have  
279 existed in the early evolution of Pooideae. In conclusion, the conserved stress response genes  
280 discussed here may have represented a fitness advantage for the Pooideae ancestor in the newly  
281 emerging environment with incidents of mild frost, allowing time to evolve the more complex  
282 physiological adaptations required to endure the temperate climate with strong seasonality and  
283 cold winters that emerged following the E-O transition [23]. Consistent with this, Schubert et al.  
284 (unpublished) showed that the fructan synthesis and ice recrystallization inhibition protein gene  
285 families known to be involved in cold acclimation in core Pooideae species [10] evolved around  
286 the E-O split, whereas also earlier evolving Pooideae species show capacity to cold acclimate.

### *Evolution of coding and regulatory sequences*

288 The molecular mechanisms behind adaptive evolution are still poorly understood, although it is  
289 now indisputably established that novel gene regulation plays a crucial role [46]. The evolution  
290 of gene regulation proceeds by altering non-coding regulatory sequences in the genome, such as  
291 (cis-) regulatory elements [47], and has the potential to evolve faster than protein sequence and

## *Evolution of cold response in Pooideae*

292 function. The high number of species specific cold response genes observed in this study is thus  
293 most consistent with the recruitment of genes with existing cold tolerance functions by means of  
294 regulatory evolution. However, previous studies have also pointed to the evolution of coding  
295 sequences [27] as underlying the acquisition of cold tolerance in Pooideae. To investigate  
296 possible coding evolution, we tested for the enrichment of positive selection among branch  
297 specific cold responsive genes (Fig. 4b). Although not statistically significant, there was a  
298 tendency for positive selection in genes gaining cold response in a period of gradual cooling  
299 preceding the E-O event. Thus, we saw evidence of both coding and regulatory evolution playing  
300 a role in cold adaptation in Pooideae, and that these processes may have interacted. Finally, gene  
301 family expansion has previously been implied in cold adaptation in Pooideae [15, 26]. As  
302 previously discussed, the conservative filtering of ortholog groups employed in this study  
303 removed complex gene families containing duplication events shared by two or more species.  
304 Interestingly, out of the 33 previously described *H. vulgare* cold responsive genes (Fig. 3), as  
305 many as 22 were not included in the high confidence ortholog groups, the main reason being that  
306 they belonged to gene families with duplications. This observation thus confirms that duplication  
307 events are a relatively common feature of cold adaptation. Although *de novo* assembly of  
308 transcriptomes from short-read RNA-Seq data is a powerful tool that has vastly expanded the  
309 number of target species for conducting transcriptomic analysis, the approach has limited power  
310 to distinguish highly similar transcripts such as paralogs. Further insight into the role of  
311 duplication events in Pooideae cold adaptation would therefore benefit immensely from  
312 additional reference genomes.

## 313 **Conclusion**

314 Here we investigated the cold response of five Pooideae species, ranging from early diverging  
315 lineages to core Pooideae species, to elucidate evolution of adaptation to cold temperate regions.  
316 We primarily observed species specific cold response that seems to have evolved chiefly after  
317 the *B. distachyon* lineage and the core Pooideae diverged, possible initiated by the drastic  
318 temperature drop during the E-O transition. However, we do also see signs of conserved  
319 response that potentially represents a shared potential for cold adaptation that explain the success  
320 of Pooideae in temperate regions. This included several general stress genes with conserved  
321 short-term response to cold as well as the conserved ability to down-regulate the photosynthetic



## *Evolution of cold response in Pooideae*

322 machinery during cold temperatures. Taken together, our observations are consistent with a  
323 scenario where many of the biochemical functions needed for cold response were present in the  
324 Pooideae common ancestor, and where different Pooideae lineages have assembled, in parallel,  
325 different overlapping subsets of these genes into fully functional cold response programs through  
326 the relatively rapid process of regulatory evolution.

## 327 **Methods**

### 328 *Plant material, sampling and sequencing*

329 To address our hypothesis, we selected five species to cover the phylogenetic spread of  
330 Pooideae. The selected species also represent major, species rich lineages or clades in the  
331 Pooideae subfamily, or belong to very early diverging lineages [5]. Seeds were collected either in  
332 nature: *Nardus stricta* (collected in Romania, [46.69098, 22.58302], July 2012) and *Melica*  
333 *nutans* (collected in Germany, [50.70708, 11.23838], June 2012); or acquired from germplasm  
334 collections: *Stipa lagascae* (PI 250751, U.S. National Plant Germplasm System (U.S.-NPGS) via  
335 Germplasm Resources Information Network [GRIN]), *Brachypodium distachyon* (line ‘Bd1-1’,  
336 W6 46201, U.S.-NPGS via GRIN) and *Hordeum vulgare* (line ‘Igri’, provided by Prof. Åsmund  
337 Bjørnstad, Department of Plant Sciences, Norwegian University of Life Sciences, Norway).  
338 Seeds were germinated and initially grown in a greenhouse at a neutral day length (12 hours of  
339 light), 17°C and a minimum artificial light intensity of 150  $\mu\text{mol}/\text{m}^2\text{s}$ . Because the seedlings of  
340 the phylogenetically diverse species grew at different rates, the sampling was based on  
341 developmental stages rather than time. Plants were grown until three to four leaves had emerged  
342 for *M. nutans*, *S. lagascae*, *B. distachyon* and *H. vulgare*, or six to seven leaves for *N. stricta*  
343 (which is a cushion forming grass that produces many small leaves compared to its overall plant  
344 size). Depending on the species, this process took one (*H. vulgare*), three (*B. distachyon* and *S.*  
345 *lagascae*), six (*M. nutans*) or eight (*N. stricta*) weeks from the time of sowing. Subsequently,  
346 plants were randomized and distributed to two cold chambers with short day (8 hours of light),  
347 6°C and a light intensity of 50  $\mu\text{mol}/\text{m}^2\text{s}$ . Leaf material for RNA isolation was collected i) in the  
348 afternoon (8 hours of light) before cold treatment (D0) and 8 hours after cold treatment (D1) and  
349 ii) in the morning (at lights on) before cold treatment (W0), 4 weeks after cold treatment (W4)  
350 and 9 weeks after cold treatment (W9) (Fig. 1d). Flash frozen leaves were individually

### *Evolution of cold response in Pooideae*

351 homogenized using a TissueLyser (Qiagen Retsch) and total RNA was isolated (from each leaf)  
352 using RNeasy Plant Mini Kit (Qiagen) following the manufacturer's instructions. The purity and  
353 integrity of total RNA extracts was determined using a NanoDrop 8000 UV-Vis  
354 Spectrophotometer (Thermo Scientific) and 2100 Bioanalyzer (Agilent), respectively. For each  
355 time point, RNA extracts from five leaves sampled from five different plants were pooled and  
356 sequenced as a single sample. In addition, replicates from single individual leaves were  
357 sequenced for selected timepoints (see Table S1 and "Differential expression" below). Two time  
358 points lacked expression values: W9 in *B. distachyon* (RNA integrity was insufficient for RNA  
359 sequencing) and W0 in *S. lagascae* (insufficient supply of plant material). Samples were sent to  
360 the Norwegian Sequencing Centre, where strand-specific cDNA libraries were prepared and  
361 sequenced (paired-end) on an Illumina HiSeq 2000 system. The raw reads are available in the  
362 ArrayExpress database ([www.ebi.ac.uk/arrayexpress](http://www.ebi.ac.uk/arrayexpress)) under accession number E-MTAB-5300.

### *Transcriptome assembly and ortholog inference*

364 Using Trimmomatic v0.32 [48], all reads were trimmed to a length of 120 bp, Illumina TruSeq  
365 adapters were removed from the raw reads, low quality bases trimmed using a sliding window of  
366 40 bp and an average quality cut-off of 15 and reads below a minimum length of 36 bp were  
367 discarded. Read quality was controlled using fastqc v0.11.2. For each species, transcripts were  
368 assembled *de novo* with Trinity v2.0.6 [49] (strand specific option, otherwise default parameters)  
369 using reads from all samples. Coding sequences (CDS) were identified using TransDecoder  
370 rel16JAN2014 [50]. Where Trinity reported multiple isoforms, only the longest CDS was  
371 retained. Ortholog groups (OGs) were constructed from the five *de novo* transcriptomes and  
372 public reference transcriptomes of *H. vulgare* (barley\_HighConf\_genes\_MIPS\_23Mar12), *B.*  
373 *distachyon* (brachypodium v1.2), *O. sativa* (rap2), *Z. mays* (ZmB73\_5a\_WGS), *S. bicolor*  
374 (sorghum 1.4) and *L. perenne* (GenBank TSA accession GAYX01000000) using OrthoMCL  
375 v2.0.9 [51]. All reference sequences except *L. perenne* were downloaded from  
376 <http://pgsb.helmholtz-muenchen.de/plant/plantsdb.jsp>. A summary of the results is provided in  
377 Table S1.

### *High confidence ortholog groups*

379 To compare gene expression across Pooideae, we identified ortholog groups containing one gene  
380 from each species that all descended from a single gene in the Pooideae ancestor. As the ortholog

### *Evolution of cold response in Pooideae*

381 groups (OGs) inferred using orthoMCL sometimes cluster more distantly related homologs as  
382 well as include both paraphyletic and monophyletic paralogs, we further refined the OGs by  
383 phylogenetic analysis. Several approaches to phylogenetic refinement has been proposed  
384 previously (see e.g. [52]). Here we first aligned protein sequences within each OG using mafft  
385 v7.130 [53] and converted to codon alignments using pal2nal v14 [54]. Gene trees were then  
386 constructed from the codon alignments using Phangorn v1.99.14 [55] (maximum likelihood  
387 GTR+I+G). Trees with apparent duplication events before the most recent common ancestor of  
388 the included species were split into several trees. This was accomplished by identifying in-group  
389 (Pooideae) and out-group (*Z. mays*, *S. bicolor* and *O. sativa*) clades in each tree, and then  
390 splitting the trees so that each resulting sub-tree contained a single out-group and a single in-  
391 group clade. Finally, we only retained the trees where all species in the tree formed one clade each  
392 (i.e. only monophyletic paralogs), *B. distachyon* and *H. vulgare* formed a clade and at least three  
393 of the five studied species were included. These trees constituted the high confidence ortholog  
394 groups (HCOGs).

### 395 *Species tree*

396 Ortholog groups with a single ortholog from each of the five *de novo* Pooideae species and *O.*  
397 *sativa* (after splitting the trees, see “High confidence ortholog groups”) were used to infer dated  
398 gene trees. To this end, BEAST v1.7.5 [56] was run with an HKY +  $\Gamma$  nucleotide substitution  
399 model using an uncorrelated lognormal relaxed clock model. A Yule process (birth only) was  
400 used as prior for the tree and the monophyly of the Pooideae was constrained. Prior estimates for  
401 the *Oryza*-Pooideae (53 Mya [SD 3.6 My], [37]) and *Brachypodium-Hordeum* (44.4 Mya [SD  
402 3.53 My], [28]) divergence times were used to define normally distributed age priors for the  
403 respective nodes in the topology. MCMC analyses were run for 10 million generations and  
404 parameters were sampled every 10.000 generation. For each gene tree analysis, the first 10  
405 percent of the estimated trees were discarded and the remaining trees were summarized to a  
406 maximum clade credibility (MCC) tree using TreeAnnotator v1.7.5. The topology of the species  
407 tree was equal to the most common topology among the 3914 MCC trees, with internal node  
408 ages set equal to the mean of the corresponding node age distributions of the MCC gene trees.

## Evolution of cold response in Pooideae

### 409 Differential expression

410 Reads were mapped to the *de novo* transcriptomes using bowtie v1.1.2 [57], and read counts  
411 were calculated with RSEM v1.2.9 [58]. In HCOGs, read counts of paralogs were summed  
412 (analogous to so called monophyly masking [59]) and missing orthologs were assumed to not be  
413 expressed (i.e. read counts equal to zero). To identify conserved and diverged cold response  
414 across species, we probed each HCOG for differentially expressed genes (DEGs). Specifically,  
415 DEGs were identified using DESeq2 v1.6.3 [60] with a model that combined the species factor  
416 and the timepoint factor (with timepoints W4/9 as a single level). Pooled samples provided  
417 robust estimates of the mean expression in each time point. To also obtain robust estimates of the  
418 variance, the model assumed common variance across all timepoints and species within each  
419 HCOG, thus taking advantage of both biological replicates available for individual time points  
420 within species and the replication provided by analysing several species. For each species, we  
421 tested the expression difference between D0 and D1 (short-term response) and the difference  
422 between W0 and W4/9 (long-term response) (Fig. 1d). *B. distachyon* lacked the W9 samples and  
423 long-term response was therefore based on W4 only. *S. lagascae* lacked the W0 sample and  
424 long-term response was therefore calculated based on D0. As a result, the observed diurnal effect  
425 (Fig. 2a) might have resulted in more unreliable estimates of the long term cold response in *S.*  
426 *lagascae* since for this species the afternoon sample (D0) was used to replace the missing  
427 morning sample (W0). Genes with a false discovery rate (FDR) adjusted p-value < 0.05 and a  
428 fold change > 2 were classified as differentially expressed.

### 429 Sample clustering

430 Sample clustering was based on read counts normalized using the variance-stabilizing  
431 transformation (VST) implemented in DESeq2 (these VST-values are essentially log  
432 transformed). HCOGs that lacked orthologs from any of the five species, or that contained  
433 orthologs with low expression (VST < 3), were removed, resulting in 4981 HCOGs used for the  
434 clustering. To highlight the effect of the cold treatment over the effect of absolute expression  
435 differences between species, the expression values were normalised per gene and species: First,  
436 one expression value was obtained per timepoint per gene by taking the mean of the replicates.  
437 Then, these expression values were centered by subtracting the mean expression of all timepoint.  
438 Distances between all pairs of samples were calculated as the sum of absolute expression

### *Evolution of cold response in Pooideae*

439 difference between orthologs in the 4981 HCOGs (i.e. manhattan distance). The tree was  
440 generated using neighbor-joining [61].

#### 441 *Comparison with known cold responsive genes*

442 A set of *H. vulgare* genes independently identified as cold responsive were acquired from  
443 supplementary table S10 in [38]. These genes were found to be responsive to cold in three  
444 independent experiments with Plexdb accessions BB64 [62], BB81 (no publication) and BB94  
445 [38]. The probesets of the Affymetrix Barley1 GeneChip microarray used in these studies were  
446 blasted (blastx) against all protein sequences in our OGs. Each probe was assigned to the OG  
447 with the best match in the *H. vulgare* reference. If several probes were assigned to the same OG,  
448 only the probe with the best hit was retained. Correspondingly, if a probe matched several  
449 paralogs within the same OG, only the best match was retained. DESeq2 was used to identify  
450 short-term response DEGs for all transcripts in all OGs (i.e. this analysis was not restricted to the  
451 HCOGs), and these were compared to DEGs from [38]. The statistical significance of the overlap  
452 between our results and those reported in [38] was assessed for each species by counting the  
453 number of genes that had the same response (up- or down-regulated DEGs) and comparing that  
454 to a null distribution. The null distribution was obtained from equivalent counts obtained from  
455 100 000 trials where genes were randomly selected from all expressed genes (mean read count >  
456 10) with an ortholog in *H. vulgare*.

#### 457 *Gene ontology enrichment tests*

458 Gene Ontology (GO) annotations for *B. distachyon* were downloaded from Ensembl Plants  
459 Biomart and assigned to the HCOGs. The TopGO v2.18.0 R package [63] was used to calculate  
460 statistically significant enrichments (Fisher's exact test,  $p < 0.05$ ) of GO biological process  
461 annotations restricted to GO plant slim in each set of branch specific DEGs using all annotated  
462 HCOGs as the background. Branch specific DEGs were those genes that were exclusively  
463 differentially expressed in all species within a clade in the phylogenetic tree.

#### 464 *Positive selection tests*

465 Each of the HCOGs were tested for positive selection using the branch-site model in codeml,  
466 which is part of PAML v4.7 [64]. We only tested branches for positive selection in HCOGs  
467 meeting the following criteria: (i) The tested branch had to be an internal branch also in the gene

## *Evolution of cold response in Pooideae*

468 tree (i.e. there was at least two species below the branch). (ii) The species below and above the  
469 tested branch in the gene tree had to be the same as in the species tree or a subset thereof. (iii)  
470 The first species to split off under the branch had to be the same as in the species tree (for the  
471 early split, either *S. lagascae* or *M. nutans* was allowed). We then used the Hypergeometric test  
472 to identify statistically significant overrepresentation of positive selection among branch specific  
473 DEGs (see “Gene ontology enrichment tests”) at the Pooideae base (PB), the early split (ES) and  
474 the late split (LS) branches.

## 475 **Declarations**

476 *Ethics approval and consent to participate*

477 Not applicable.

478 *Consent for publication*

479 Not applicable.

480 *Availability of data and material*

481 The raw reads, the assembled transcripts and the raw read counts are available in the  
482 ArrayExpress database ([www.ebi.ac.uk/arrayexpress](http://www.ebi.ac.uk/arrayexpress)) under accession number E-MTAB-5300.

483 *Competing interests*

484 The authors declare that they have no competing interests.

485 *Funding*

486 The research was funded by grants from the Nansen Foundation to SF and the TVERRforsk  
487 program at the Norwegian University of Life Sciences (NMBU) to SF, TRH and SRS. This work  
488 was part of the PhD projects of MS and LG funded by NMBU.

489 *Authors' contributions*

490 All authors designed the experiment. M.S. performed the growth experiments, sampled and  
491 prepared RNA for sequencing, helped designing the data analysis pipeline, contributed to the  
492 positive selection analysis and performed the phylogenetic analyses. L.G. developed,  
493 implemented and conducted the data analysis. All authors interpreted the results. M.S. and L.G.  
494 wrote the manuscript with input from S.F., T.R.H., and S.R.S.

## *Evolution of cold response in Pooideae*

### 495 *Acknowledgements*

496 We thank Åsmund Bjørnstad and USDA-NPGS GRIN for providing seeds of *H. vulgare*, and *B.*  
497 *distachyon* and *S. lagascae*, respectively. For technical assistance handling plants during growth  
498 experiments we thank Øyvind Jørgensen. We are grateful to Erica Leder, Thomas Marcussen,  
499 Ursula Brandes and Camilla Lorange Lindberg for helpful comments on earlier versions of this  
500 manuscript.

### 501 **References**

- 502 1. Hartley W. Studies on Origin, Evolution, and Distribution of Gramineae. 5. The Subfamily  
503 Festucoideae. Aust J Bot. 1973;21:201–34.
- 504 2. Bouchenak-Khelladi Y, Verboom AG, Savolainen V, Hodkinson TR. Biogeography of the  
505 grasses (Poaceae): a phylogenetic approach to reveal evolutionary history in geographical space  
506 and geological time. Bot J Linn Soc. 2010;162:543–57.
- 507 3. Strömberg CAE. Evolution of Grasses and Grassland Ecosystems. Annu Rev Earth Planet Sci.  
508 2011;39:517–44.
- 509 4. Edwards EJ, Smith SA. Phylogenetic Analyses Reveal the Shady History of C<sub>4</sub> Grasses. Proc  
510 Natl Acad Sci U S A. 2010;107:2532–7.
- 511 5. Soreng RJ, Peterson PM, Romaschenko K, Davidse G, Zuloaga FO, Judziewicz EJ, et al. A  
512 worldwide phylogenetic classification of the Poaceae (Gramineae). J Syst Evol. 2015;53:117–37.
- 513 6. Tsvetanov S, Atanassov A, Nakamura C. Cold Responsive Gene/Protein Families and  
514 Cold/Freezing Tolerance in Cereals. Biotechnol Biotechnol Equip. 2000;14:3–11.
- 515 7. Galiba G, Vágújfalvi A, Li C, Soltész A, Dubcovsky J. Regulatory genes involved in the  
516 determination of frost tolerance in temperate cereals. Plant Sci. 2009;176:12–9.
- 517 8. Thomashow MF. Molecular Basis of Plant Cold Acclimation: Insights Gained from Studying  
518 the CBF Cold Response Pathway. Plant Physiol. 2010;154:571–7.
- 519 9. Kosová K, Vítámvás P, Práčil IT. Expression of dehydrins in wheat and barley under different  
520 temperatures. Plant Sci. 2011;180:46–52.
- 521 10. Sandve SR, Kosmala A, Rudi H, Fjellheim S, Rapacz M, Yamada T, et al. Molecular

*Evolution of cold response in Pooideae*

- 522 mechanisms underlying frost tolerance in perennial grasses adapted to cold climates. *Plant Sci.*  
523 2011;180:69–77.
- 524 11. Tondelli A, Francia E, Barabaschi D, Pasquariello M, Pecchioni N. Inside the *CBF* locus in  
525 Poaceae. *Plant Sci.* 2011;180:39–45.
- 526 12. Crosatti C, Rizza F, Badeck FW, Mazzucotelli E, Cattivelli L. Harden the chloroplast to  
527 protect the plant. *Physiol Plant.* 2013;147:55–63.
- 528 13. Preston JC, Sandve SR. Adaptation to seasonality and the winter freeze. *Front Plant Sci.*  
529 2013;4 June:167.
- 530 14. Davis JJ, Soreng RJ. Phylogenetic Structure in the Grass Family (Poaceae) as Inferred from  
531 Chloroplast DNA Restriction Site Variation. *Am J Bot.* 1993;80:1444–54.
- 532 15. Li C, Rudi H, Stockinger EJ, Cheng H, Cao M, Fox SE, et al. Comparative analyses reveal  
533 potential uses of *Brachypodium distachyon* as a model for cold stress responses in temperate  
534 grasses. *BMC Plant Biol.* 2012;12:65.
- 535 16. Priest HD, Fox SE, Rowley ER, Murray JR, Michael TP, Mockler TC, et al. Analysis of  
536 Global Gene Expression in *Brachypodium distachyon* Reveals Extensive Network Plasticity in  
537 Response to Abiotic Stress. *PLoS One.* 2014;9:e87499.
- 538 17. Colton-Gagnon K, Ali-Benali MA, Mayer BF, Dionne R, Bertrand A, Do Carmo S, et al.  
539 Comparative analysis of the cold acclimation and freezing tolerance capacities of seven diploid  
540 *Brachypodium distachyon* accessions. *Ann Bot.* 2014;113:681–93.
- 541 18. Zachos J, Pagani M, Sloan L, Thomas E, Billups K. Trends, rhythms, and aberrations in  
542 global climate 65 Ma to present. *Science.* 2001;292:686–93.
- 543 19. Eberle JJ, Greenwood DR. Life at the top of the greenhouse Eocene world--A review of the  
544 Eocene flora and vertebrate fauna from Canada's High Arctic. *Geol Soc Am Bull.* 2011;124:3–  
545 23.
- 546 20. Schubert BA, Jahren AH, Eberle JJ, Sternberg LSL, Eberth DA. A summertime rainy season  
547 in the Arctic forests of the Eocene. *Geology.* 2012;40:523–6.
- 548 21. Pross J, Contreras L, Bijl PK, Greenwood DR, Bohaty SM, Schouten S, et al. Persistent near-  
549 tropical warmth on the Antarctic continent during the early Eocene epoch. *Nature.* 2012;488:73–



*Evolution of cold response in Pooideae*

- 550 7.
- 551 22. Mudelsee M, Bickert T, Lear CH, Lohmann G. Cenozoic climate changes: A review based  
552 on time series analysis of marine benthic  $\delta$  18 O records. *Rev Geophys.* 2014;52:333–74.
- 553 23. Eldrett JS, Greenwood DR, Harding IC, Huber M. Increased seasonality through the Eocene  
554 to Oligocene transition in northern high latitudes. *Nature.* 2009;459:969–73.
- 555 24. Hren MT, Sheldon ND, Grimes ST, Collinson ME, Hooker JJ, Bugler M, et al. Terrestrial  
556 cooling in Northern Europe during the eocene-oligocene transition. *Proc Natl Acad Sci U S A.*  
557 2013;110:7562–7.
- 558 25. Kerkhoff AJ, Moriarty PE, Weiser MD. The latitudinal species richness gradient in New  
559 World woody angiosperms is consistent with the tropical conservatism hypothesis. *Proc Natl*  
560 *Acad Sci U S A.* 2014;111:8125–30.
- 561 26. Sandve SR, Fjellheim S. Did gene family expansions during the Eocene-Oligocene boundary  
562 climate cooling play a role in Pooideae adaptation to cool climates? *Mol Biol.* 2010;19:2075–88.
- 563 27. Vigeland MD, Spannagl M, Asp T, Paina C, Rudi H, Rognli O-A, et al. Evidence for  
564 adaptive evolution of low-temperature stress response genes in a Pooideae grass ancestor. *New*  
565 *Phytol.* 2013;199:1060–8.
- 566 28. Marcussen T, Sandve SR, Heier L, Spannagl M, Pfeifer M, Jakobsen KS, et al. Ancient  
567 hybridizations among the ancestral genomes of bread wheat. *Science.* 2014;345:1250092.
- 568 29. Donoghue MJ. Colloquium paper: a phylogenetic perspective on the distribution of plant  
569 diversity. *Proc Natl Acad Sci U S A.* 2008; Suppl 1:11549–55.
- 570 30. Thomashow MF. Plant Cold Acclimation: Freezing Tolerance Genes and Regulatory  
571 Mechanisms. *Annu Rev Plant Physiol Plant Mol Biol.* 1999;50:571–99.
- 572 31. Janská A, Maršík P, Zelenková S, Ovesná J. Cold stress and acclimation - what is important  
573 for metabolic adjustment? *Plant Biol.* 2010;12:395–405.
- 574 32. Carvallo MA, Pino M-T, Jeknic Z, Zou C, Doherty CJ, Shiu S-H, et al. A comparison of the  
575 low temperature transcriptomes and CBF regulons of three plant species that differ in freezing  
576 tolerance: *Solanum commersonii*, *Solanum tuberosum*, and *Arabidopsis thaliana*. *J Exp Bot.*  
577 2011;62:3807–19.

*Evolution of cold response in Pooideae*

- 578 33. Zhang T, Zhao X, Wang W, Pan Y, Huang L, Liu X, et al. Comparative transcriptome  
579 profiling of chilling stress responsiveness in two contrasting rice genotypes. PLoS One.  
580 2012;7:e43274.
- 581 34. Lindlöf A, Chawade A, Sikora P, Olsson O. Comparative Transcriptomics of Sijung and  
582 Jumli Marshi Rice during Early Chilling Stress Imply Multiple Protective Mechanisms. PLoS  
583 One. 2015;10:e0125385.
- 584 35. Yang Y-W, Chen H-C, Jen W-F, Liu L-Y, Chang M-C. Comparative Transcriptome Analysis  
585 of Shoots and Roots of TNG67 and TCN1 Rice Seedlings under Cold Stress and Following  
586 Subsequent Recovery: Insights into Metabolic Pathways, Phytohormones, and Transcription  
587 Factors. PLoS One. 2015;10:e0131391.
- 588 36. Abeynayake SW, Byrne S, Nagy I, Jonavičienė K, Etzerodt TP, Boelt B, et al. Changes in  
589 *Lolium perenne* transcriptome during cold acclimation in two genotypes adapted to different  
590 climatic conditions. BMC Plant Biol. 2015;15:250.
- 591 37. Christin P-A, Spriggs E, Osborne CP, Stromberg CAE, Salamin N, Edwards EJ. Molecular  
592 Dating, Evolutionary Rates, and the Age of the Grasses. Syst Biol. 2014;63:153–65.
- 593 38. Greenup AG, Sharyar S, Oliver SN, Walford SA, Millar AA, Trevaskis B. Transcriptome  
594 Analysis of the Vernalization Response in Barley (*Hordeum vulgare*) Seedlings. PLoS One.  
595 2011;6:e17900.
- 596 39. Christin P-A, Boxall SF, Gregory R, Edwards EJ, Hartwell J, Osborne CP. Parallel  
597 Recruitment of Multiple Genes into C4 Photosynthesis. Genome Biol Evol. 2013;5:2174–87.
- 598 40. Christin P-A, Arakaki M, Osborne CP, Edwards EJ. Genetic Enablers Underlying the  
599 Clustered Evolutionary Origins of C4 Photosynthesis in Angiosperms. Mol Biol Evol.  
600 2015;32:846–58.
- 601 41. Kellogg EA. Evolutionary History of the Grasses. Plant Physiol. 2001;125:1198–205.
- 602 42. Schardl CL, Craven KD, Speakman S, Stromberg A, Lindstrom A, Yoshida R. A novel test  
603 for host-symbiont codivergence indicates ancient origin of fungal endophytes in grasses. Syst  
604 Biol. 2008;57:483–98.
- 605 43. Bieniawska Z, Espinoza C, Schlereth A, Sulpice R, Hinch DK, Hannah MA. Disruption of

*Evolution of cold response in Pooideae*

- 606 the Arabidopsis circadian clock is responsible for extensive variation in the cold-responsive  
607 transcriptome. *Plant Physiol.* 2008;147:263–79.
- 608 44. Nakamichi N, Kiba T, Henriques R, Mizuno T, Chua NH, Sakakibara H. PSEUDO-  
609 RESPONSE REGULATORS 9, 7, and 5 Are Transcriptional Repressors in the Arabidopsis  
610 Circadian Clock. *Plant Cell.* 2010;22:594–605.
- 611 45. Johansson M, Ramos-Sánchez JM, Conde D, Ibáñez C, Takata N, Allona I, et al. Role of the  
612 Circadian Clock in Cold Acclimation and Winter Dormancy in Perennial Plants. In: *Advances in*  
613 *Plant Dormancy.* Cham: Springer International Publishing; 2015. p. 51–74.
- 614 46. Romero IG, Ruvinsky I, Gilad Y. Comparative studies of gene expression and the evolution  
615 of gene regulation. *Nat Rev Genet.* 2012;13:505–16.
- 616 47. Wittkopp PJ, Kalay G. Cis-regulatory elements: molecular mechanisms and evolutionary  
617 processes underlying divergence. *Nat Rev Genet.* 2012;13:59–69.
- 618 48. Bolger AM, Lohse M, Usadel B. Trimmomatic: a flexible trimmer for Illumina sequence  
619 data. *Bioinformatics.* 2014;:btu170.
- 620 49. Grabherr MG, Haas BJ, Yassour M, Levin JZ, Thompson DA, Amit I, et al. Full-length  
621 transcriptome assembly from RNA-Seq data without a reference genome. *Nat Biotechnol.*  
622 2011;29:644.
- 623 50. Haas BJ, Papanicolaou A, Yassour M, Grabherr M, Blood PD, Bowden J, et al. De novo  
624 transcript sequence reconstruction from RNA-seq using the Trinity platform for reference  
625 generation and analysis. *Nat Protoc.* 2013;8:1494–512.
- 626 51. Li L, Stoeckert CJ, Roos DS. OrthoMCL: identification of ortholog groups for eukaryotic  
627 genomes. *Genome Res.* 2003;13:2178–89.
- 628 52. Yang Y, Smith SA. Orthology inference in nonmodel organisms using transcriptomes and  
629 low-coverage genomes: improving accuracy and matrix occupancy for phylogenomics. *Mol Biol*  
630 *Evol.* 2014;31:3081–92.
- 631 53. Katoh K, Standley DM. MAFFT Multiple Sequence Alignment Software Version 7:  
632 Improvements in Performance and Usability. *Mol Biol Evol.* 2013;30:772–80.
- 633 54. Suyama M, Torrents D, Bork P. PAL2NAL: robust conversion of protein sequence

*Evolution of cold response in Pooideae*

- 634 alignments into the corresponding codon alignments. *Nucleic Acids Res.* 2006;34 suppl  
635 2:W609–12.
- 636 55. Schliep KP. phangorn: phylogenetic analysis in R. *Bioinformatics.* 2011;27:592–3.
- 637 56. Drummond AJ, Rambaut A, Huelsenbeck J, Ronquist F, Beaumont M, Drummond A, et al.  
638 BEAST: Bayesian evolutionary analysis by sampling trees. *BMC Evol Biol.* 2007;7:214.
- 639 57. Langmead B, Trapnell C, Pop M, Salzberg SL, Down T, Rakyen V, et al. Ultrafast and  
640 memory-efficient alignment of short DNA sequences to the human genome. *Genome Biol.*  
641 2009;10:R25.
- 642 58. Li B, Dewey CN, Wang Z, Gerstein M, Snyder M, Katz Y, et al. RSEM: accurate transcript  
643 quantification from RNA-Seq data with or without a reference genome. *BMC Bioinformatics.*  
644 2011;12:323.
- 645 59. Smith SA, Wilson NG, Goetz FE, Feehery C, Andrade SCS, Rouse GW, et al. Resolving the  
646 evolutionary relationships of molluscs with phylogenomic tools. *Nature.* 2011;480:364–7.
- 647 60. Love MI, Huber W, Anders S, Lönnstedt I, Speed T, Robinson M, et al. Moderated  
648 estimation of fold change and dispersion for RNA-seq data with DESeq2. *Genome Biol* 2014  
649 1512. 2014;15:31–46.
- 650 61. Saitou N, Nei M. The neighbor-joining method: a new method for reconstructing  
651 phylogenetic trees. *Mol Biol Evol.* 1987;4:406–25.
- 652 62. Svensson JT, Crosatti C, Campoli C, Bassi R, Stanca AM, Close TJ, et al. Transcriptome  
653 Analysis of Cold Acclimation in Barley Albina and Xantha Mutants. *PLANT Physiol.*  
654 2006;141:257–70.
- 655 63. Alexa A, Rahnenfuhrer J. topGO: Enrichment analysis for Gene Ontology. R package  
656 version 2.18.0. October. 2010.
- 657 64. Yang Z. PAML 4: Phylogenetic Analysis by Maximum Likelihood. *Mol Biol Evol.*  
658 2007;24:1586–91.
- 659 65. Yuan F, Yang H, Xue Y, Kong D, Ye R, Li C, et al. OSCA1 mediates osmotic-stress-evoked  
660 Ca<sup>2+</sup> increases vital for osmosensing in Arabidopsis. *Nature.* 2014;514:367–71.

*Evolution of cold response in Pooideae*

- 661 66. Hou C, Tian W, Kleist T, He K, Garcia V, Bai F, et al. DUF221 proteins are a family of  
662 osmosensitive calcium-permeable cation channels conserved across eukaryotes. *Cell Res.*  
663 2014;24:632–5.
- 664 67. Li Y, Yuan F, Wen Z, Li Y, Wang F, Zhu T, et al. Genome-wide survey and expression  
665 analysis of the OSCA gene family in rice. *BMC Plant Biol.* 2015;15:261.
- 666 68. Day IS, Reddy VS, Shad Ali G, Reddy ASN. Analysis of EF-hand-containing proteins in  
667 *Arabidopsis*. *Genome Biol.* 2002;3:RESEARCH0056.
- 668 69. Bose J, Pottosin II, Shabala SS, Palmgren MG, Shabala S. Calcium Efflux Systems in Stress  
669 Signaling and Adaptation in Plants. *Front Plant Sci.* 2011;2:85.
- 670 70. Yang Q-S, Gao J, He W-D, Dou T-X, Ding L-J, Wu J-H, et al. Comparative transcriptomics  
671 analysis reveals difference of key gene expression between banana and plantain in response to  
672 cold stress. *BMC Genomics.* 2015;16:446.
- 673 71. Andrés F, Coupland G. The genetic basis of flowering responses to seasonal cues. *Nat Rev*  
674 *Genet.* 2012;13:627–39.
- 675 72. Cao S, Ye M, Jiang S. Involvement of GIGANTEA gene in the regulation of the cold stress  
676 response in *Arabidopsis*. *Plant Cell Rep.* 2005;24:683–90.
- 677 73. Xie Q, Lou P, Hermand V, Aman R, Park HJ, Yun D-J, et al. Allelic polymorphism of  
678 GIGANTEA is responsible for naturally occurring variation in circadian period in *Brassica rapa*.  
679 *Proc Natl Acad Sci U S A.* 2015;112:3829–34.
- 680 74. Sobkowiak A, Jończyk M, Jarochovska E, Biecek P, Trzcinska-Danielewicz J, Leipner J, et  
681 al. Genome-wide transcriptomic analysis of response to low temperature reveals candidate genes  
682 determining divergent cold-sensitivity of maize inbred lines. *Plant Mol Biol.* 2014;85:317–31.
- 683 75. Murakami-Kojima M. The APRR3 Component of the Clock-Associated APRR1/TOC1  
684 Quintet is Phosphorylated by a Novel Protein Kinase Belonging to the WNK Family, the Gene  
685 for which is also Transcribed Rhythmically in *Arabidopsis thaliana*. *Plant Cell Physiol.*  
686 2002;43:675–83.
- 687 76. Murakami M. Characterization of Circadian-Associated APRR3 Pseudo-Response Regulator  
688 Belonging to the APRR1/TOC1 Quintet in *Arabidopsis thaliana*. *Plant Cell Physiol.*

*Evolution of cold response in Pooideae*

- 689 2004;45:645–50.
- 690 77. Wang Z-Y, Xiong L, Li W, Zhu J-K, Zhu J. The plant cuticle is required for osmotic stress  
691 regulation of abscisic acid biosynthesis and osmotic stress tolerance in Arabidopsis. *Plant Cell*.  
692 2011;23:1971–84.
- 693 78. Liu D, Wang L, Zhai H, Song X, He S, Liu Q. A novel  $\alpha/\beta$ -hydrolase gene IbMas enhances  
694 salt tolerance in transgenic sweetpotato. *PLoS One*. 2014;9:e115128.
- 695 79. Guan W, Ferry N, Edwards MG, Bell HA, Othman H, Gatehouse JA, et al. Proteomic  
696 analysis shows that stress response proteins are significantly up-regulated in resistant diploid  
697 wheat (*Triticum monococcum*) in response to attack by the grain aphid (*Sitobion avenae*). *Mol*  
698 *Breed*. 2015;35:57.
- 699 80. Kimura M, Yamamoto YY, Seki M, Sakurai T, Sato M, Abe T, et al. Identification of  
700 Arabidopsis Genes Regulated by High Light-Stress Using cDNA Microarray¶. *Photochem*  
701 *Photobiol*. 2003;77:226–33.
- 702 81. Singh S, Cornilescu CC, Tyler RC, Cornilescu G, Tonelli M, Lee MS, et al. Solution  
703 structure of a late embryogenesis abundant protein (LEA14) from Arabidopsis thaliana, a cellular  
704 stress-related protein. *Protein Sci*. 2005;14:2601–9.
- 705 82. Rinne P, Welling A, Kaikuranta P. Onset of freezing tolerance in birch (*Betula pubescens*  
706 Ehrh.) involves LEA proteins and osmoregulation and is impaired in an ABA-deficient genotype.  
707 *Plant, Cell Environ*. 1998;21:601–11.
- 708 83. Gagné-Bourque F, Mayer BF, Charron J-B, Vali H, Bertrand A, Jabaji S. Accelerated  
709 Growth Rate and Increased Drought Stress Resilience of the Model Grass *Brachypodium*  
710 *distachyon* Colonized by *Bacillus subtilis* B26. *PLoS One*. 2015;10:e0130456.
- 711 84. Nakashima K, Takasaki H, Mizoi J, Shinozaki K, Yamaguchi-Shinozaki K. NAC  
712 transcription factors in plant abiotic stress responses. *Biochim Biophys Acta*. 2012;1819:97–103.
- 713 85. Negi S, Tak H, Ganapathi TR. Expression analysis of MusaNAC68 transcription factor and  
714 its functional analysis by overexpression in transgenic banana plants. *Plant Cell, Tissue Organ*  
715 *Cult*. 2015;125:59–70.
- 716 86. Mao X, Chen S, Li A, Zhai C, Jing R. Novel NAC transcription factor TaNAC67 confers

*Evolution of cold response in Pooideae*

- 717 enhanced multi-abiotic stress tolerances in Arabidopsis. PLoS One. 2014;9:e84359.
- 718 87. Murakami M. The Evolutionarily Conserved OsPRR Quintet: Rice Pseudo-Response  
719 Regulators Implicated in Circadian Rhythm. Plant Cell Physiol. 2003;44:1229–36.
- 720 88. Campoli C, Shtaya M, Davis SJ, von Korff M. Expression conservation within the circadian  
721 clock of a monocot: natural variation at barley Ppd-H1 affects circadian expression of flowering  
722 time genes, but not clock orthologs. BMC Plant Biol. 2012;12:97.
- 723 89. Lee B, Henderson DA, Zhu J-K. The Arabidopsis cold-responsive transcriptome and its  
724 regulation by ICE1. Plant Cell. 2005;17:3155–75.
- 725 90. Wang G, Cai G, Kong F, Deng Y, Ma N, Meng Q. Overexpression of tomato chloroplast-  
726 targeted DnaJ protein enhances tolerance to drought stress and resistance to Pseudomonas  
727 solanacearum in transgenic tobacco. Plant Physiol Biochem. 2014;82:95–104.
- 728 91. Kong F, Deng Y, Zhou B, Wang G, Wang Y, Meng Q. A chloroplast-targeted DnaJ protein  
729 contributes to maintenance of photosystem II under chilling stress. J Exp Bot. 2014;65:143–58.
- 730 92. Yin Y, Mohnen D, Gelineo-Albersheim I, Xu Y, Hahn MG. Glycosyltransferases of the GT8  
731 Family. In: Annual Plant Reviews Volume 41: Plant Polysaccharides, Biosynthesis and  
732 Bioengineering. WILEY-BLACKWELL; 2011. p. 167–211.
- 733 93. Qi Y, Kawano N, Yamauchi Y, Ling J, Li D, Tanaka K. Identification and cloning of a  
734 submergence-induced gene OsGGT (glycogenin glucosyltransferase) from rice (*Oryza sativa* L.)  
735 by suppression subtractive hybridization. Planta. 2005;221:437–45.
- 736 94. Uddin MI, Kihara M, Yin L, Perveen MF, Tanaka K. Expression and subcellular localization  
737 of antiporter regulating protein OsARP in rice induced by submergence, salt and drought  
738 stresses. African Journal of Biotechnology. 2012;11:12849–55.
- 739 95. Hijmans RJ, Cameron SE, Parra JL, Jones PG, Jarvis A. Very high resolution interpolated  
740 climate surfaces for global land areas. Int J Climatol. 2005;25:1965–78.
- 741

*Evolution of cold response in Pooideae*

742 **Supporting Information**

743 **Table S1. Summary statistics for the sampling, the transcriptome assembly, coding**  
744 **sequence detection and ortholog group inference.** Isoforms were not included in the counts.  
745 Only ortholog groups with at least one coding transcript from the five studied species were  
746 included.

747 **Table S2. High confidence ortholog groups (HCOGs).** HCOGs generated by filtering and  
748 splitting ortholog groups (see Methods). Ortholog groups were stored as a table with the ortholog  
749 group IDs as rows and species as columns. Each cell contains sequence IDs separated by “;”.  
750 Groups that were the result of splitting larger ortholog groups were marked by a number suffix in  
751 the group ID.

752 **Table S3. A cross species expression matrix.** Combined read counts for high confidence  
753 ortholog groups. Column represents samples and rows represents HCOGs. The sample IDs in the  
754 column header consists of the species ID, the time point, indication of whether the sample is  
755 pooled from five individual plants (“mix”) or just a single individual plant (“ind”) and the  
756 replicate number.

757 **Table S4. Differential expression results for the high confidence ortholog groups (HCOGs).**  
758 A table with rows representing HCOGs and columns representing differential expression results  
759 including log<sub>2</sub> fold changes, P-values and FDR adjusted p-values for short- and long-term  
760 responses.

761 **Figure S1: The four most common gene tree topologies.** We generated gene trees from a  
762 selected set of 3914 ortholog groups (see Methods). This figure depicts the four most common  
763 topologies.
